# Supplementary material for: A high-resolution gridded dataset of livestock distribution on the Mongolian Plateau (2000–2020)
Source: Copernicus journal article supplement (doi:10.5194/essd-2025-256), 2025-05-20
Supplement: Supplementary file [file essd-2025-256-AC2-supplement.pdf]

S1. Reclassification information of land cover data products.

| Code | Type               | MCD12Q1 (500 m)                                                                                                                               | GLC_FCS30D (30 m)                                                                                                                                                                                                                                                                                                                                                                      |
|------|--------------------|-----------------------------------------------------------------------------------------------------------------------------------------------|----------------------------------------------------------------------------------------------------------------------------------------------------------------------------------------------------------------------------------------------------------------------------------------------------------------------------------------------------------------------------------------|
| 1    | Cropland           | 12 Croplands, 14 Cropland/Natural Vegetation Mo- saics                                                                                        | 10 Rainfed cropland, 11 Herbaceous cover, 12 Tree or shrub cover, 20 Irrigated cropland                                                                                                                                                                                                                                                                                                |
| 2    | Forest             | 1 Evergreen Needleleaf Forests, 2 Evergreen Broadleaf Forests, 3 Deciduous Needleleaf Forests, 4 Deciduous Broadleaf Forests, 5 Mixed Forests | 51 Open evergreen broadleaved forest, 52 Closed evergreen broadleaved forest, 61 Open deciduous broadleaved forest, 62 Closed deciduous broadleaved forest, 71 Open evergreen needle-leaved forest, 72 Closed evergreen needle-leaved forest, 81 Open deciduous needle-leaved forest, 82 Closed deciduous needle-leaved forest, 91 Open mixed leaf forest, 92 Closed mixed leaf forest |
| 3    | Grassland          | 8 Woody Savannas, 9 Savannas, 10 Grasslands                                                                                                   | 130 Grassland                                                                                                                                                                                                                                                                                                                                                                          |
| 4    | Shrubland          | 6 Closed Shrublands, 7 Open Shrublands                                                                                                        | 122 Deciduous shrubland                                                                                                                                                                                                                                                                                                                                                                |
| 5    | Wetland            | 11 Permanent Wetlands                                                                                                                         | 180 Wetlands                                                                                                                                                                                                                                                                                                                                                                           |
| 6    | Water              | 17 Water Bodies                                                                                                                               | 210 Water body                                                                                                                                                                                                                                                                                                                                                                         |
| 7    | Tundra             | /                                                                                                                                             | 140 Lichens and mosses, 150 Sparse vegetation                                                                                                                                                                                                                                                                                                                                          |
| 8    | Impervious surface | 13 Urban and Built-up Lands                                                                                                                   | 190 Impervious surfaces                                                                                                                                                                                                                                                                                                                                                                |
| 9    | Bare land          | 16 Barren                                                                                                                                     | 200 Bare areas, 201 Consolidated bare areas                                                                                                                                                                                                                                                                                                                                            |
| 10   | Permanent ice/snow | 15 Permanent Snow and Ice                                                                                                                     | 202 Unconsolidated bare areas, 152 Sparse shrubland, 153 Sparse herbaceous                                                                                                                                                                                                                                                                                                             |
|      |                    |                                                                                                                                               | 220 Permanent ice and snow                                                                                                                                                                                                                                                                                                                                                             |
